# Supplementary material
Source: bioRxiv or medRxiv preprint supplement (https://www.biorxiv.org/highwire/filestream/137391/field_highwire_adjunct_files/2/361105-3.pdf)
Supplement: Supplementary file [file 361105-3.pdf]

**Disc Margin/  
Ventral Groove**

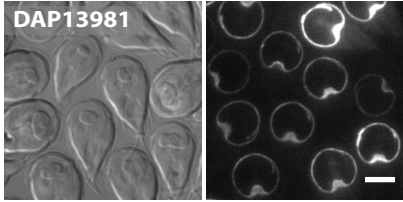

Nek kinase

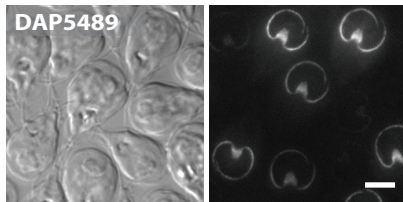

Nek kinase

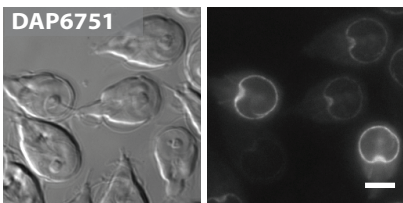

novel

**Ventral Groove**

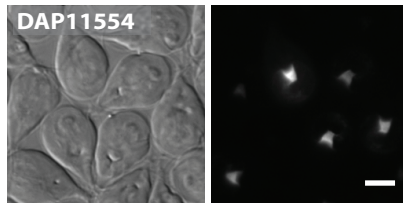

Nek kinase

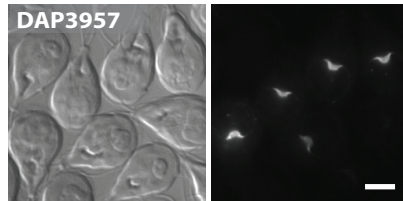

Nek kinase, ankyrin repeat

**Disc Margin/Overlap Zone/  
Ventral Groove**

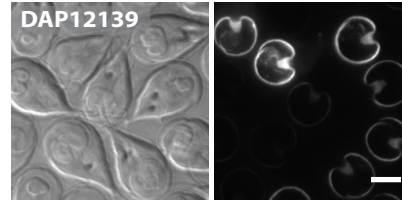

ankyrin repeat

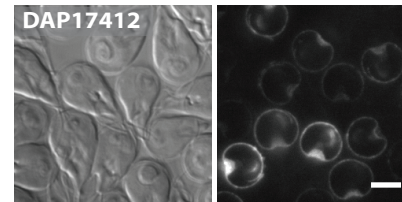

novel

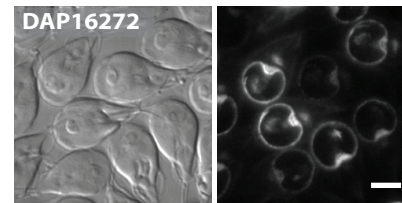

Nek kinase, ankyrin repeat

**Body/Ventral Groove**

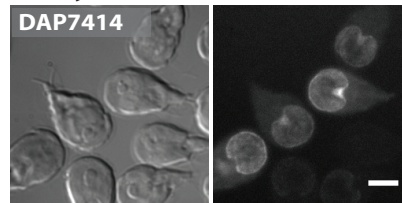

novel

**Body/Overlap Zone/  
Disc Margin**

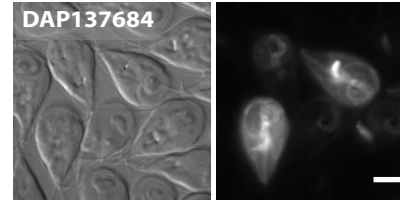

ankyrin repeat

**Body/Overlap Zone/  
Ventral Groove/  
Disc Margin**

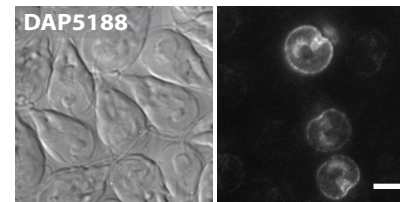

ankyrin repeat

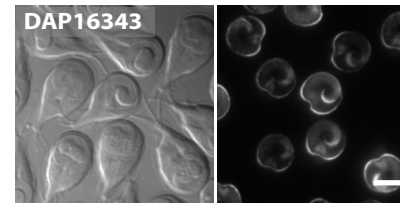

median body protein (novel)

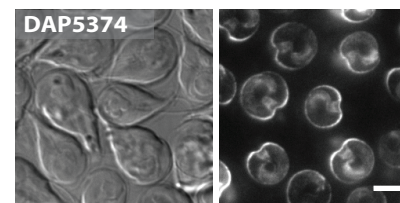

CAP-GLY

**Overlap Zone**

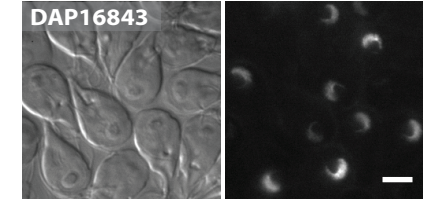

ankyrin repeat

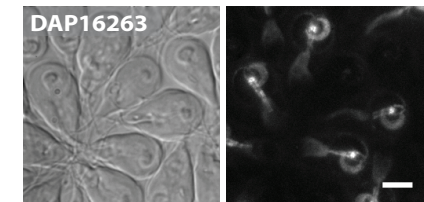

conserved hypothetical

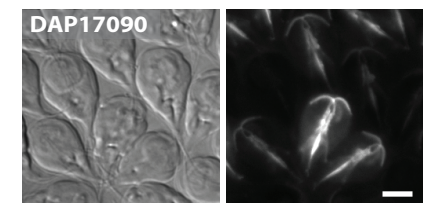

SAM domain
